# Supplementary material
Source: publisher site journal article supplement (https://www.kjim.org/upload/media/kjim-2024-399-Supplementary-Table-2.pdf)
Supplement: Supplementary file 1 [file kjim-2024-399-Supplementary-Table-2.pdf]

**Supplementary Table 2. PRUs (P2Y<sub>12</sub> reaction units) over time within group**

|                                   | Tegoprazan (n = 107) | PPI (n = 155) | <i>p</i> value |
|-----------------------------------|----------------------|---------------|----------------|
| Change from 3 months at 6 months  | 10 ± 9               | -5 ± 6        | 0.189          |
| <i>p</i> value (within group)     | 0.249                | 0.515         |                |
| Change from 6 months at 12 months | -12 ± 10             | 7 ± 7         | 0.133          |
| <i>p</i> value (within group)     | 0.246                | 0.327         |                |

PRU, platelet reaction unit; PPI, proton-pump inhibitor.
